# Supplementary material for: Proteomic Profiling of MIS-C Patients Reveals Heterogeneity Relating to Interferon Gamma Dysregulation and Vascular Endothelial Dysfunction
Source: bioRxiv or medRxiv preprint supplement (doi:10.1101/2021.04.13.21255439), 2021-04-20

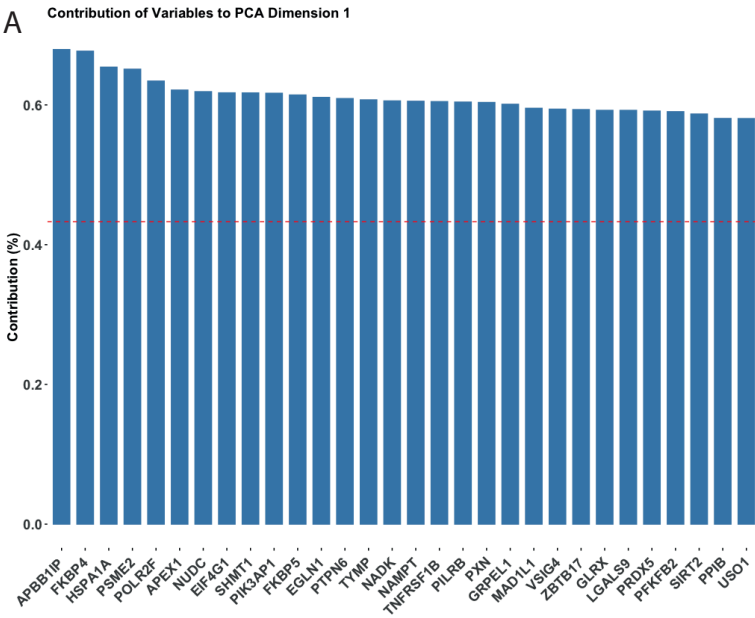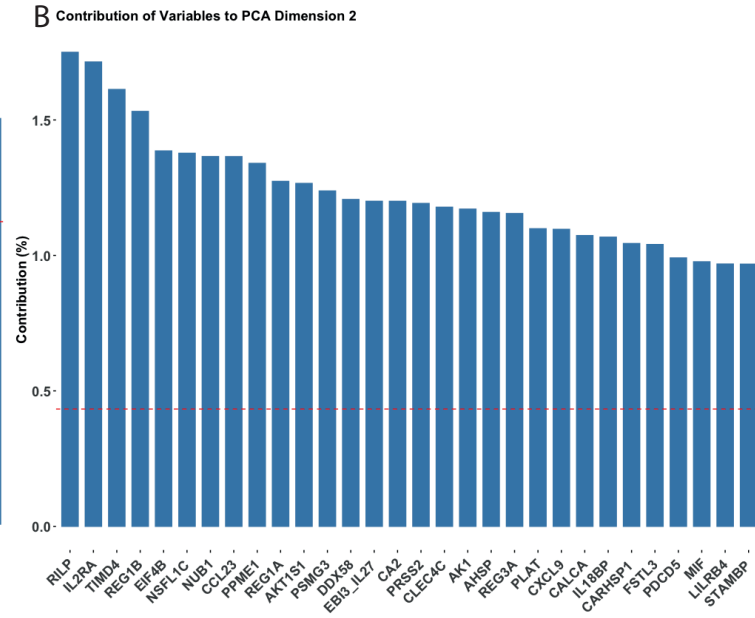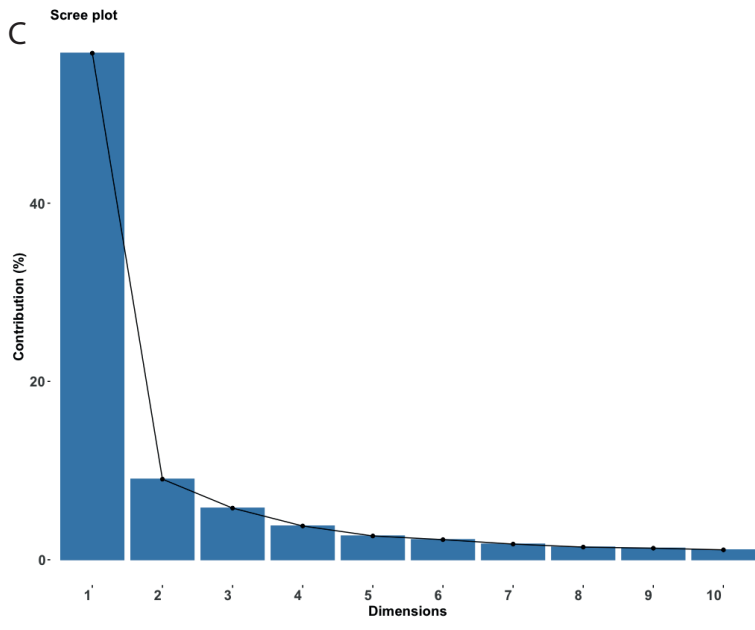

Supplement: Supplementary file [file media-2.pdf]
